# Supplementary material for: Impact of thermal treatment on the quality, total antioxidant and antibacterial properties of fermented camel milk
Source: Springer Nature journal article supplement (doi:10.1038/s41598-025-91548-1), 2025-03-12
Supplement: MOESM1 [file 41598_2025_91548_MOESM1_ESM.pdf]

## Supplementary File

Raw gel electrophoresis Chromatogram .

Different shots were taken for the same chromatogram.

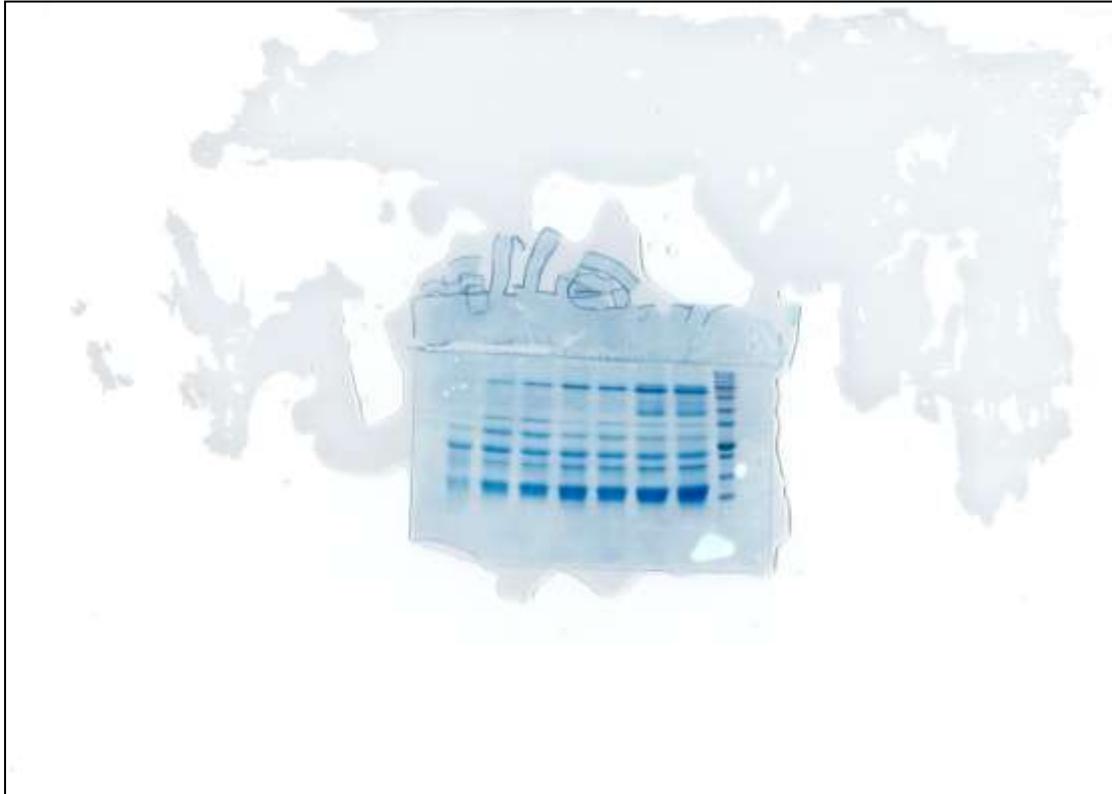

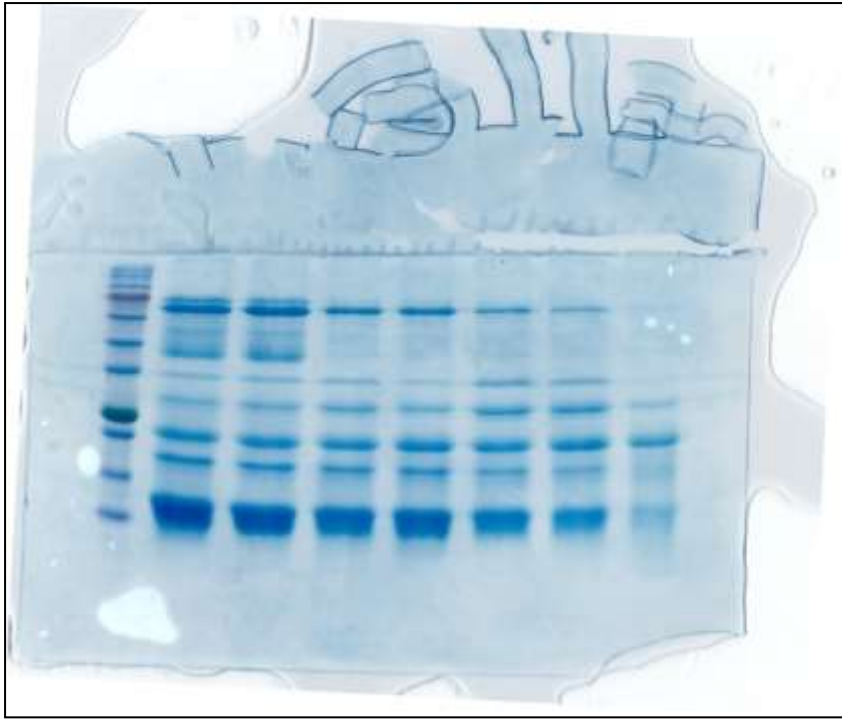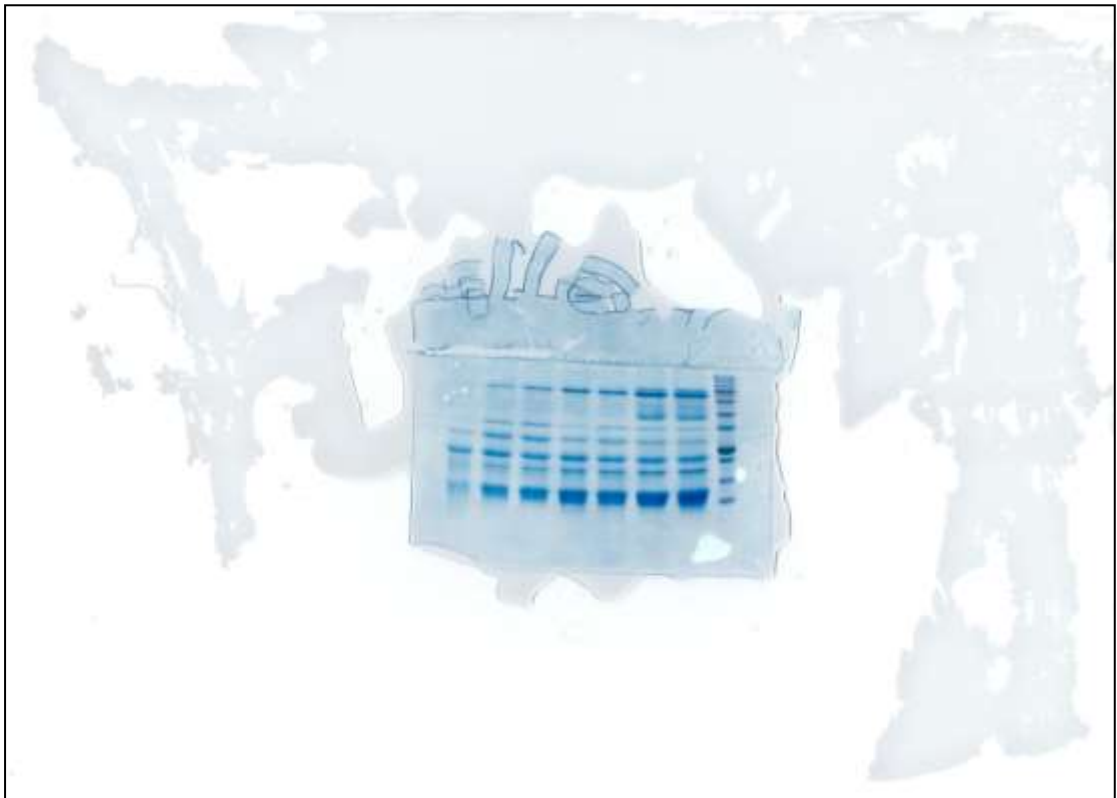

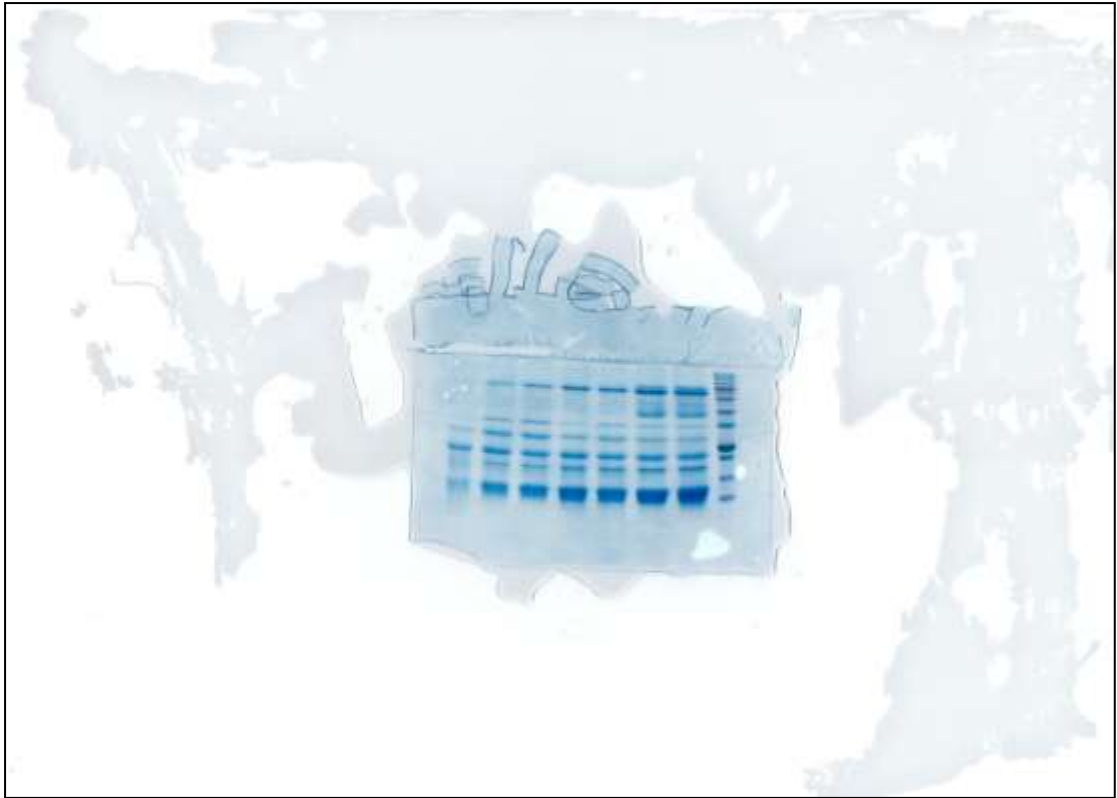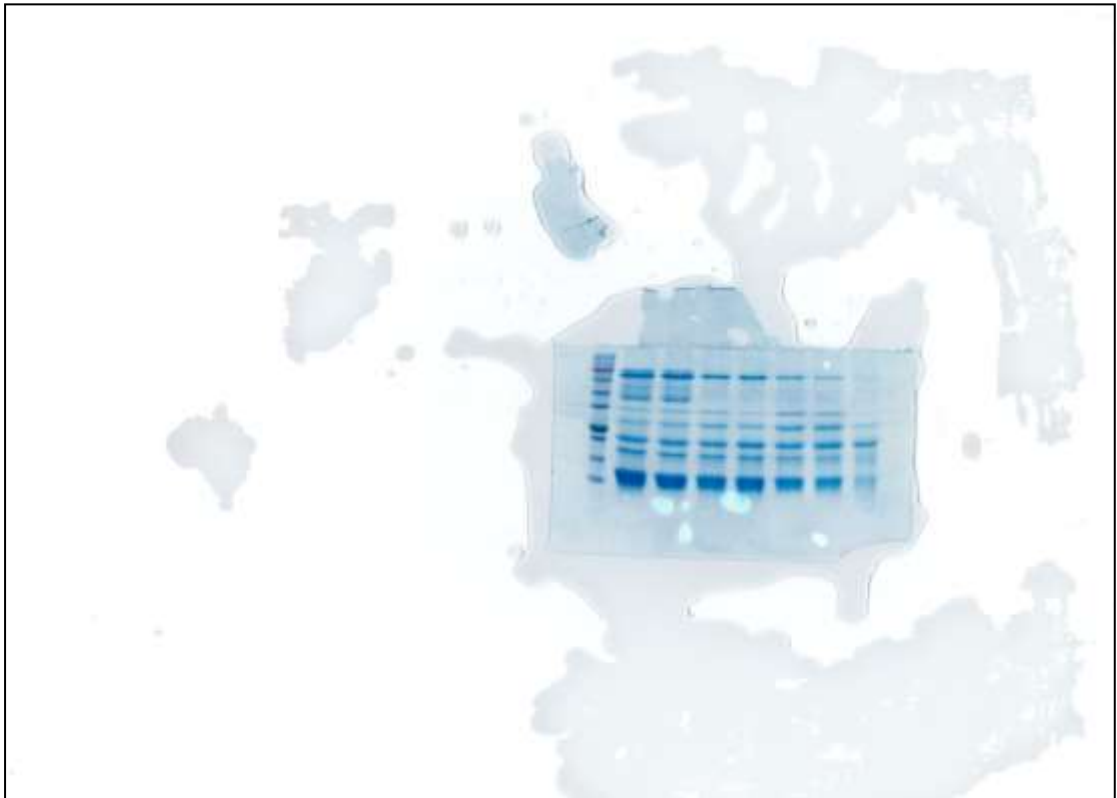

Link for Gel Analyzer 23.1 software

<http://www.gelalyzer.com/>

Statistical analyses [SAS, 2004 (SAS Institute, Inc., Cary, NC)] is purchased version
